# Supplementary material for: Coordination of rooting, xylem, and stomatal strategies explains the response of conifer forest stands to multi-year drought in the southern Sierra Nevada of California
Source: Copernicus journal article supplement (doi:10.5194/bg-20-4491-2023), 2023-11-17

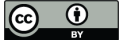

*Supplement of*

## **Coordination of rooting, xylem, and stomatal strategies explains the response of conifer forest stands to multi-year drought in the southern Sierra Nevada of California**

**Junyan Ding et al.**

*Correspondence to:* Junyan Ding ([junyan.ding@pnnl.gov](mailto:junyan.ding@pnnl.gov))

The copyright of individual parts of the supplement might differ from the article licence.

Figures S1 a) monthly GPP and b) latent heat flux of full sensitivity analysis grouped by rooting depth

a)

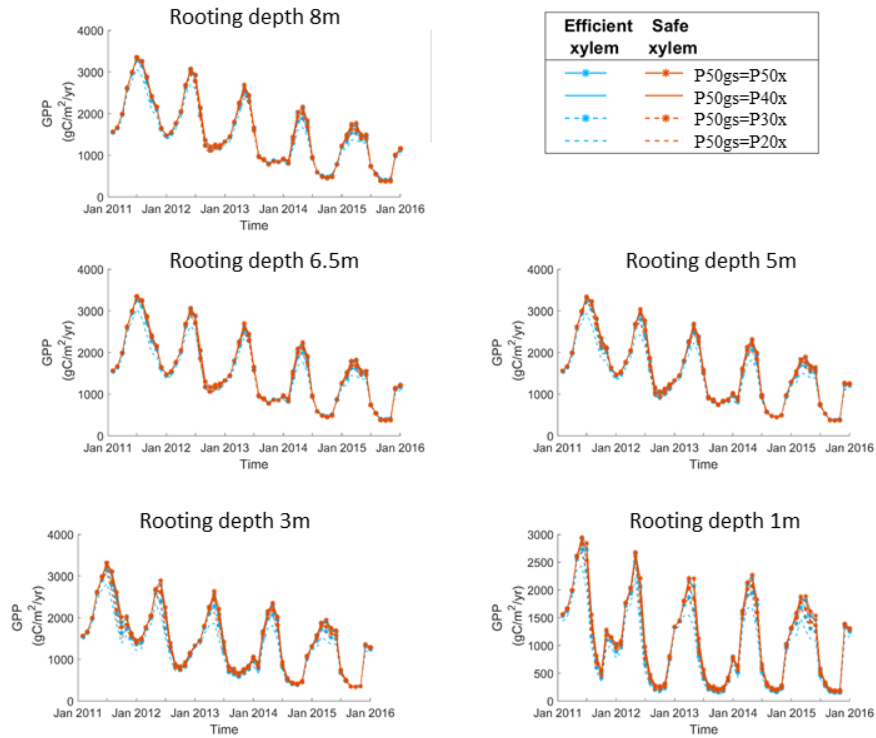

b)

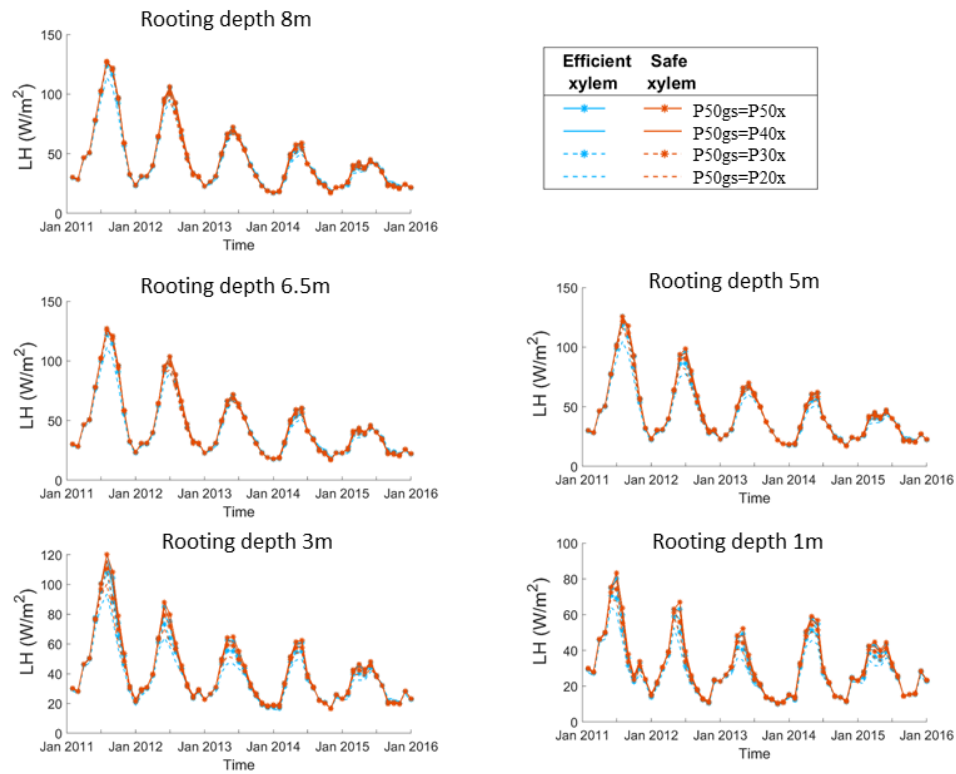

Figure S2. Mean hourly GPP and Latent Heat flux by month and year of five effective rooting depth scenarios: a) 8m, b) 6.5m, c) 5m, d) 3m, and e) 1m.

a) GPP and LH of 8m rooting depth

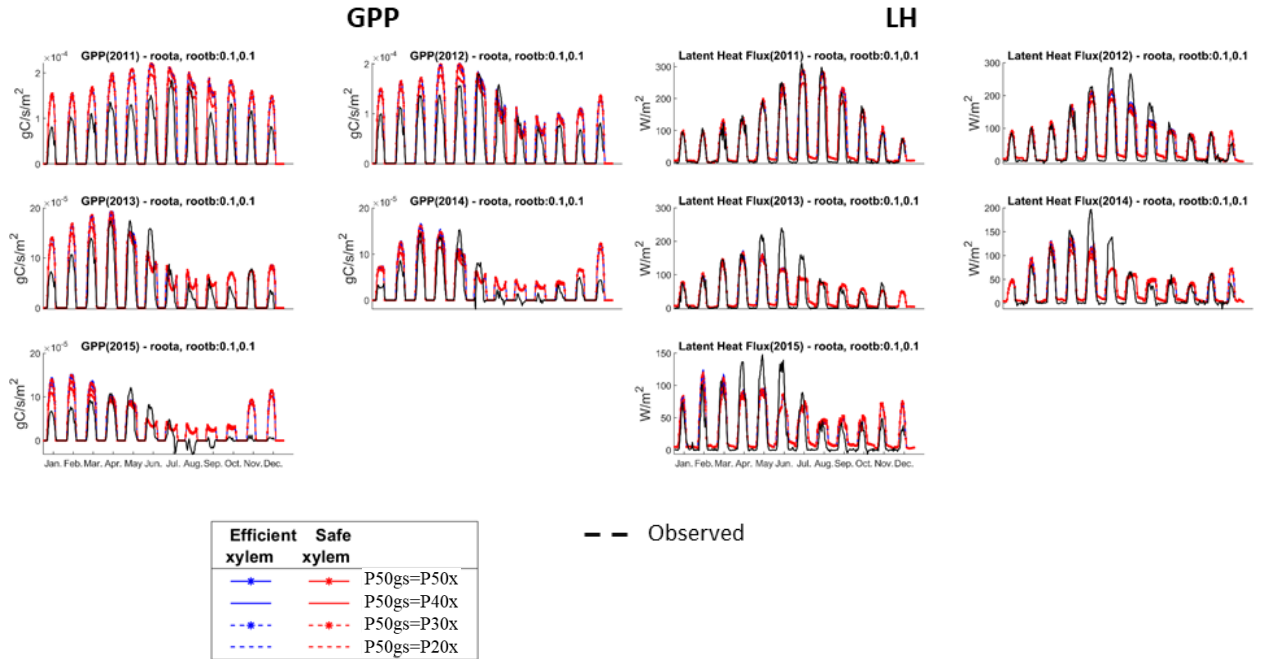

b) GPP and LH of 6.5m rooting depth

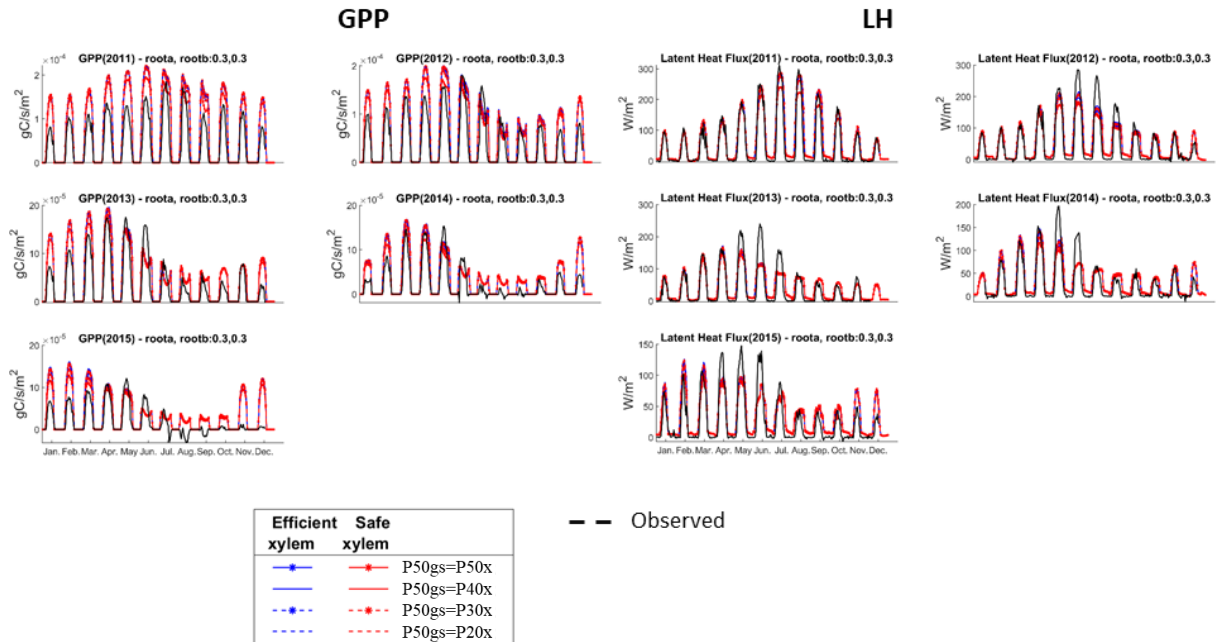

c) GPP and LH of 5m rooting depth

**GPP**

**LH**

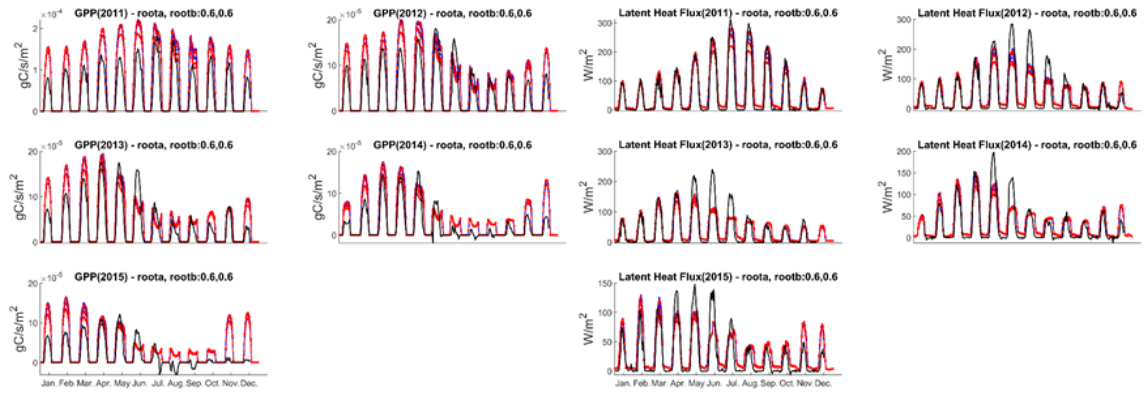

| Efficient xylem | Safe xylem |            |
|-----------------|------------|------------|
| —●—             | —●—        | P50gs=P50x |
| —●—             | —●—        | P50gs=P40x |
| - - -●-         | - - -●-    | P50gs=P30x |
| - - -●-         | - - -●-    | P50gs=P20x |

- - - Observed

d) GPP and LH of 3m rooting depth

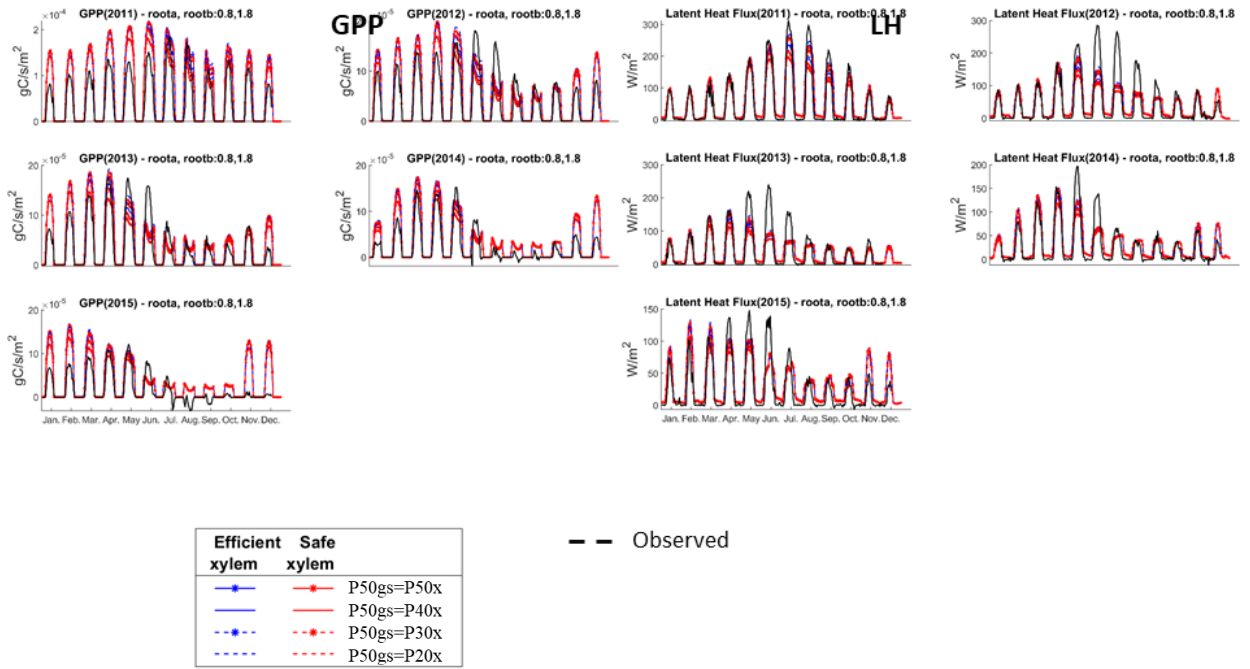

e) GPP and LH of 1m rooting depth

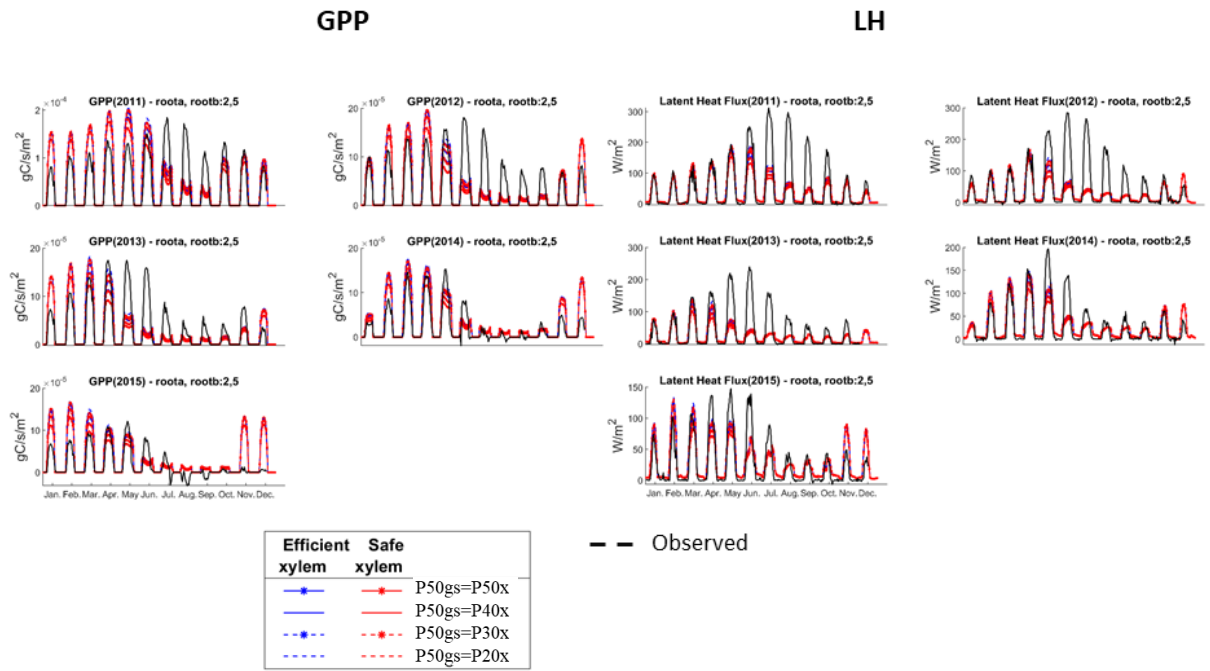

Figure S3 A.) monthly mean stem fraction of conductance (SFCL,  $K/K_{max}$ ) of all cohorts and B.) monthly mean leaf water potential (LWP) of all cohorts

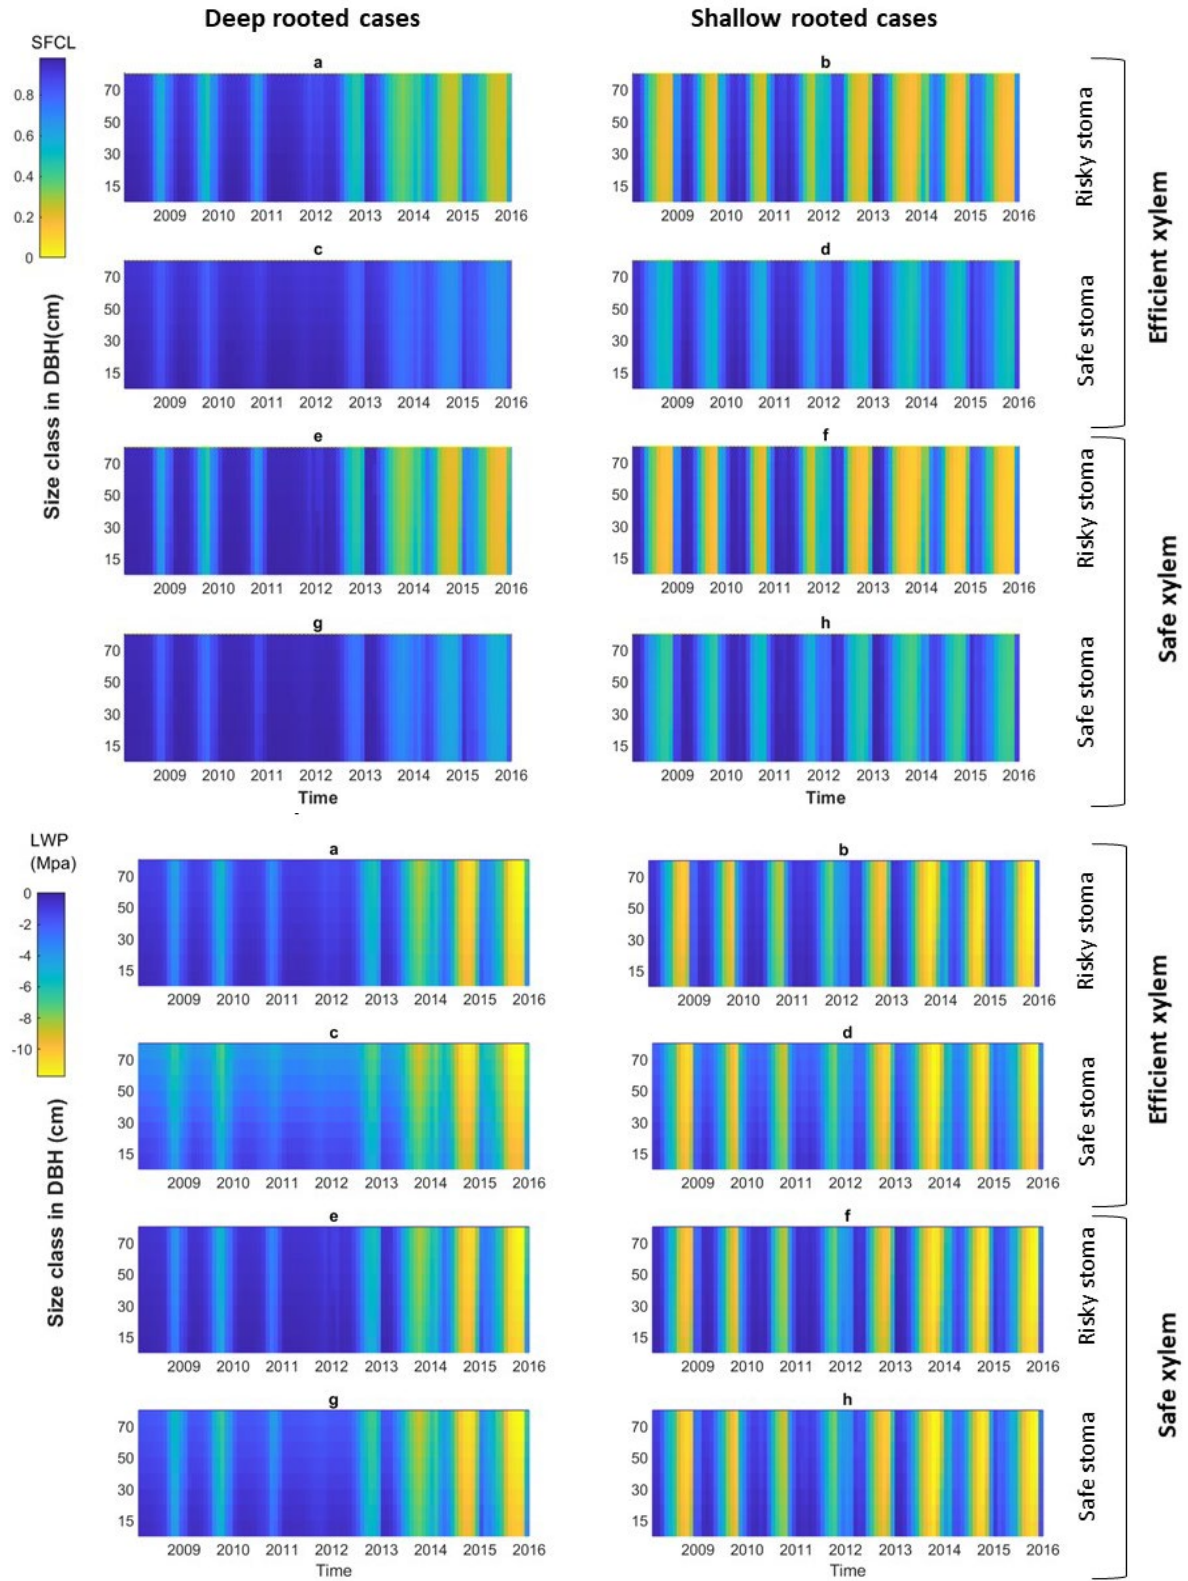

Figure S4 Seasonal variation of water content for selected layers

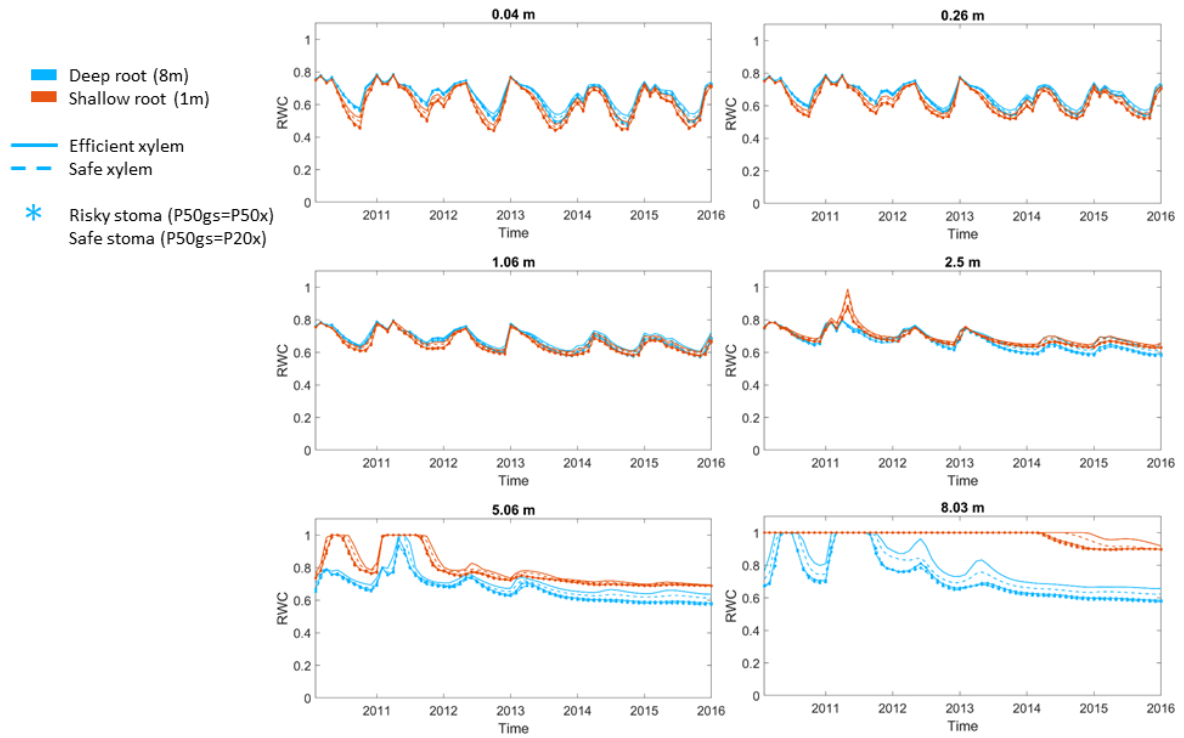

Figure S5. Relation between simulated day time leaf water potential (LWP) and absorbing root water potential (AWP)

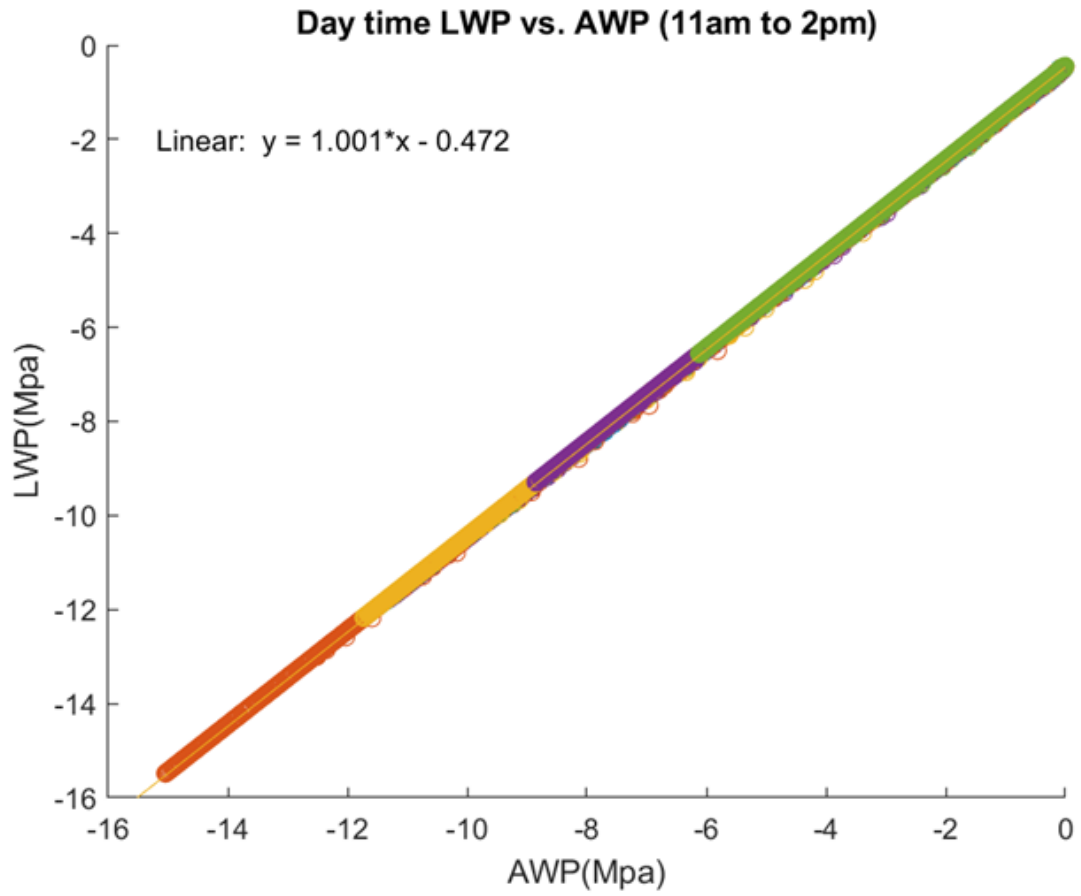



Figure S6. Vulnerability curves for two xylem strategies shown in both absolute units ( $K$ ) as pressure-conductance curve (solid lines) and relative units ( $K/K_{max}$ ) as pressure-fraction of conductance (dashed lines). The red dot indicates the intersection point of the absolute pressure-conductance curve. On the right side of the point, efficient xylem has higher conductance at any given pressure but a lower fraction of conductance as compared to the safe xylem.

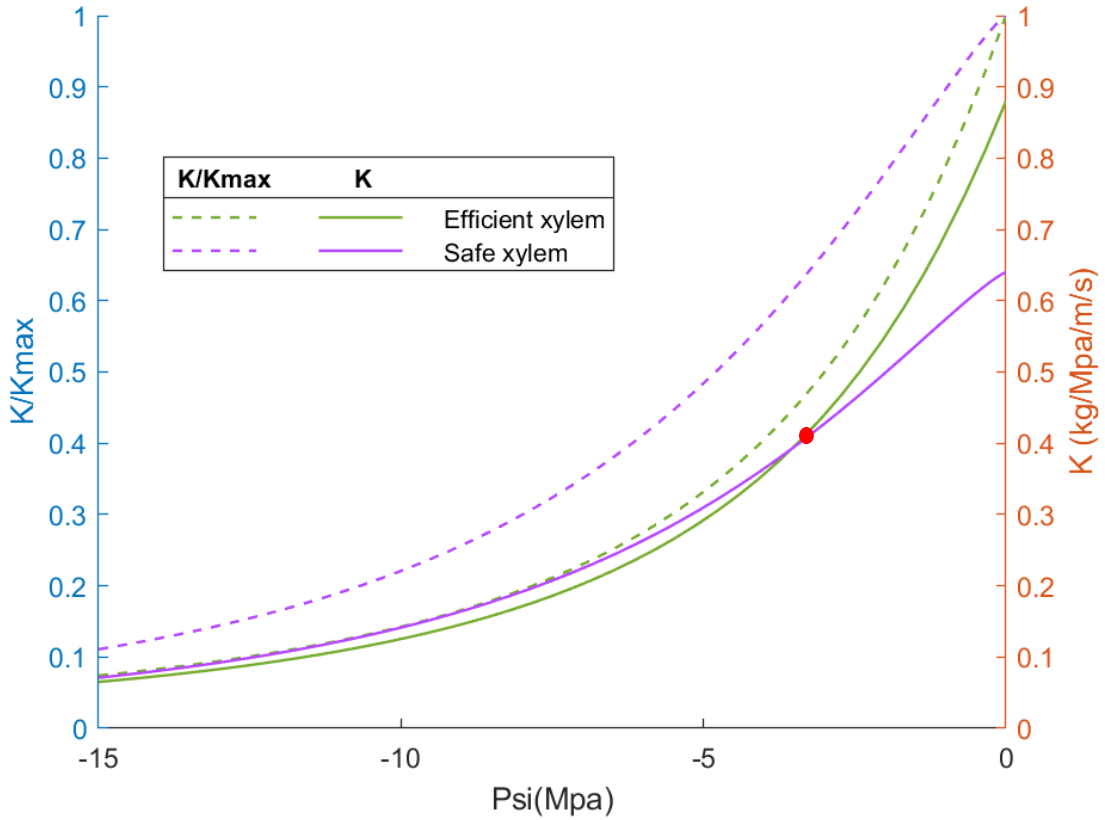

Figure S7. Estimated vulnerability curve of pine based on xylem vulnerability traits (P12, P50,P88) from TRY database

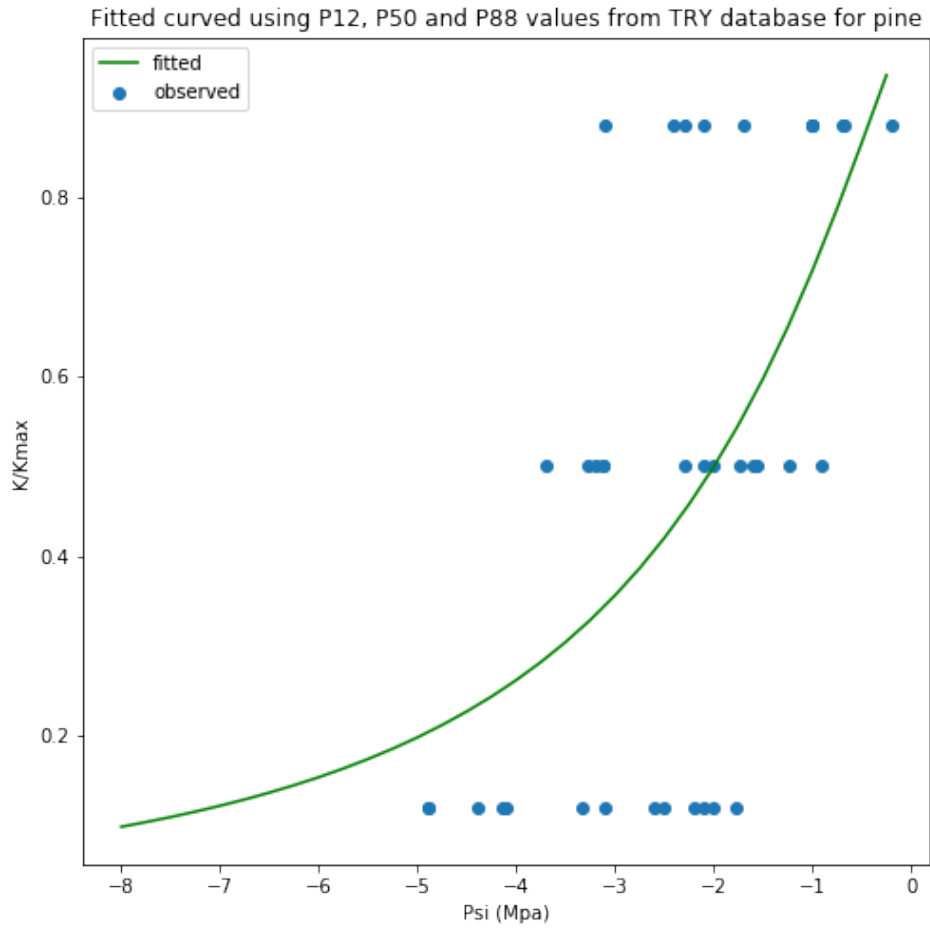

Fig. S8 Comparison of MACA and flux tower meteorology data: monthly mean of a) precipitation, b) relative humidity c), air temperature, and d) incident solar radiation

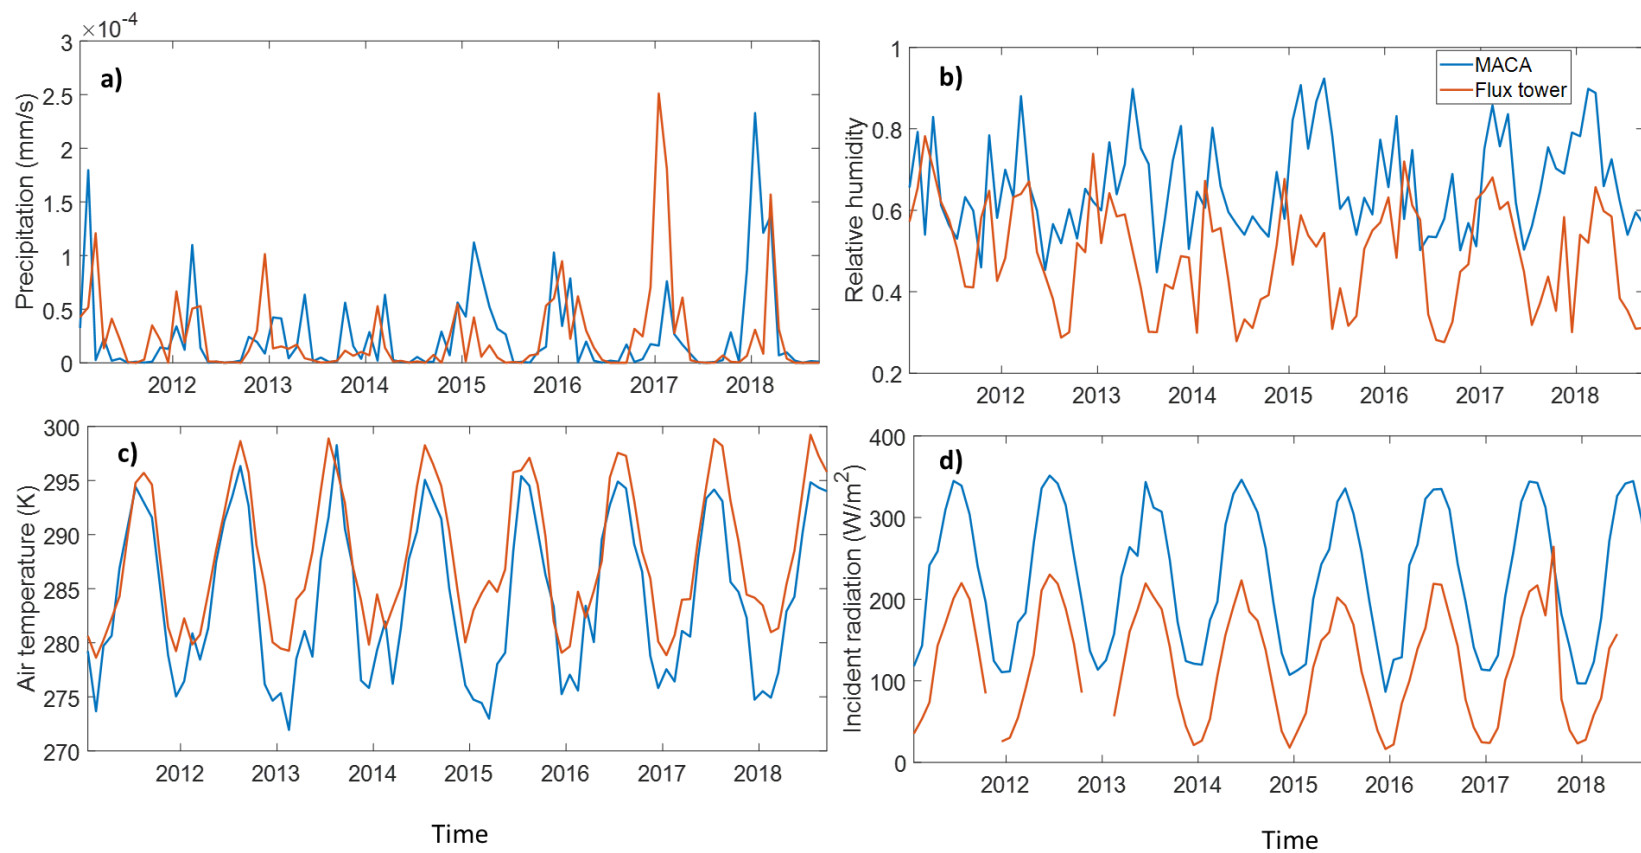

Supplement: Supplementary file 1 [file bg-20-4491-2023-supplement.pdf]
